# Supplementary material
Source: Springer Nature journal article supplement (https://www.springermedizin.de/resource/supplementary/12937_2009_279_MOESM2_ESM.pdf/25654772)

M

200

100

50

25

10

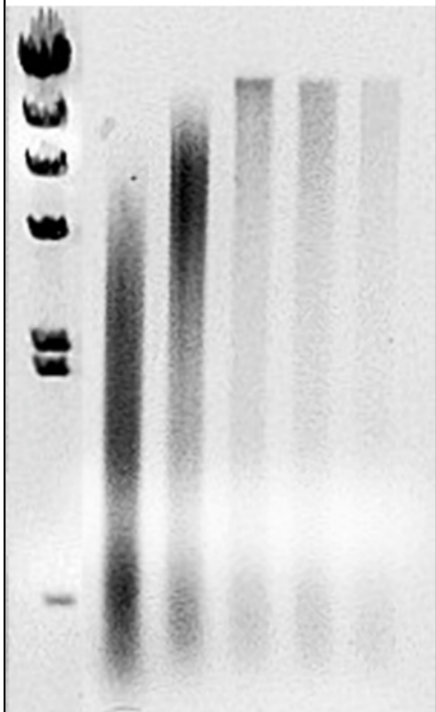

Supplement: MOESM2 [file 25654772]
